# Supplementary material for: The B7H4-PDL1 classifier stratifies immuno-phenotype in cervical cancer
Source: PubMed Central journal article supplement (PMC8728907; doi:10.1186/s12935-021-02423-8), 2022-01-04

**A**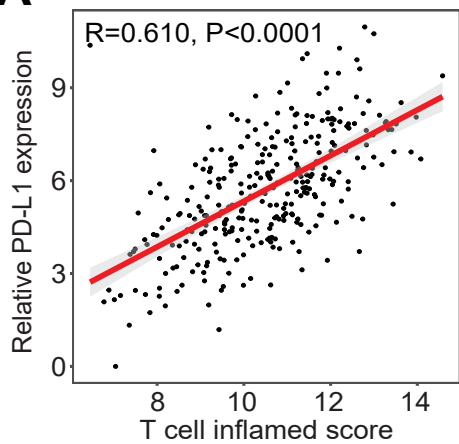**B**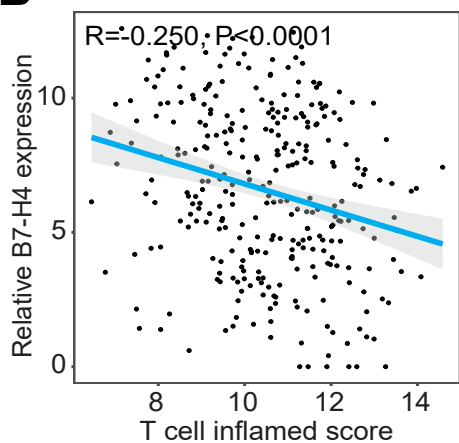**C**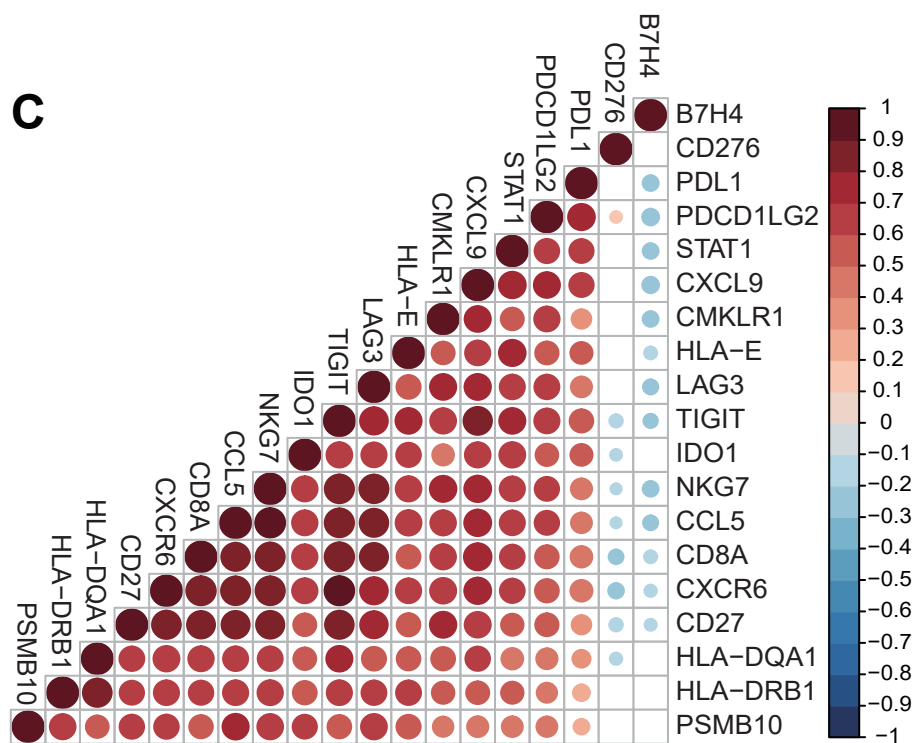

Supplement: 12935_2021_2423_MOESM2_ESM.pdf [file 12935_2021_2423_MOESM2_ESM.pdf]
